# Supplementary material for: The increased gray matter volumes of precentral gyri in Parkinson's disease patients with diphasic dyskinesia
Source: Aging (Albany NY). 2019 Nov 7;11(21):9661–71. doi: 10.18632/aging.102412 (PMC6874449; doi:10.18632/aging.102412)
Supplement: Supplementary Table 1 [file aging-11-102412-s001.xls]

## Sheet: Sheet1
group	Gender (1male/2female)	age	Education	number	lh_bankssts_thickness	lh_caudalanteriorcingulate_thickness	lh_caudalmiddlefrontal_thickness	lh_cuneus_thickness	lh_entorhinal_thickness	lh_fusiform_thickness	lh_inferiorparietal_thickness	lh_inferiortemporal_thickness	lh_isthmuscingulate_thickness	lh_lateraloccipital_thickness	lh_lateralorbitofrontal_thickness	lh_lingual_thickness	lh_medialorbitofrontal_thickness	lh_middletemporal_thickness	lh_parahippocampal_thickness	lh_paracentral_thickness	lh_parsopercularis_thickness	lh_parsorbitalis_thickness	lh_parstriangularis_thickness	lh_pericalcarine_thickness	lh_postcentral_thickness	lh_posteriorcingulate_thickness	lh_precentral_thickness	lh_precuneus_thickness	lh_rostralanteriorcingulate_thickness	lh_rostralmiddlefrontal_thickness	lh_superiorfrontal_thickness	lh_superiorparietal_thickness	lh_superiortemporal_thickness	lh_supramarginal_thickness	lh_frontalpole_thickness	lh_temporalpole_thickness	lh_transversetemporal_thickness	lh_insula_thickness	rh_bankssts_thickness	rh_caudalanteriorcingulate_thickness	rh_caudalmiddlefrontal_thickness	rh_cuneus_thickness	rh_entorhinal_thickness	rh_fusiform_thickness	rh_inferiorparietal_thickness	rh_inferiortemporal_thickness	rh_isthmuscingulate_thickness	rh_lateraloccipital_thickness	rh_lateralorbitofrontal_thickness
LO PD with diphasic dyskinetic	2	65	6	subject001	2.227	2.455	2.362	1.792	2.783	2.472	2.27	2.508	2.049	2.063	2.362	1.898	2.258	2.485	2.755	2.197	2.416	2.523	2.189	1.441	2.254	2.161	2.1	2.069	2.546	2.427	2.677	2.041	2.414	2.365	2.463	3.24	1.949	2.643	2.289	2.717	2.549	1.793	3.549	2.493	2.298	2.556	1.769	2.169	2.31
LO PD with diphasic dyskinetic	1	82	9	subject002	2.496	2.454	2.229	1.682	2.981	2.322	2.27	2.823	2.351	1.987	2.443	1.695	2.346	2.701	1.985	2.326	2.48	2.677	2.284	1.473	2.308	2.152	1.998	2.172	2.501	2.37	2.641	2.062	2.425	2.48	2.711	3.314	1.747	2.472	2.326	2.366	2.302	1.729	3.035	2.339	2.374	2.767	2.423	2.221	2.422
LO PD with diphasic dyskinetic	1	67	12	subject003	2.279	2.253	2.32	1.81	3.039	2.534	2.031	2.524	2.375	2.013	2.416	1.974	2.287	2.474	2.243	2.267	2.323	2.316	2.17	1.519	2.013	2.541	2.417	2.122	2.399	2.207	2.479	2.032	2.54	2.184	2.49	3.584	2.199	2.827	2.411	2.521	2.35	1.644	3.403	2.473	2.16	2.512	2.079	2.127	2.475
LO PD with diphasic dyskinetic	1	66	12	subject004	2.45	3.108	2.764	1.855	3.809	2.571	2.463	2.69	2.652	2.29	2.524	1.779	2.314	2.883	2.034	2.703	2.742	2.76	2.487	1.628	2.314	2.918	2.756	2.418	2.891	2.397	2.843	2.453	2.713	2.596	3.025	3.552	2.288	2.901	2.536	2.461	2.626	2.049	3.643	2.461	2.515	2.793	2.437	2.308	2.634
LO PD with diphasic dyskinetic	1	73	15	subject005	2.428	3.19	2.486	1.754	2.148	2.508	2.22	2.576	2.257	2.194	2.549	1.92	2.507	2.532	2.351	2.358	2.425	2.317	2.197	1.592	1.965	2.273	2.461	2.147	2.722	2.352	2.574	2.063	2.374	2.362	2.507	3.461	2.062	2.784	2.299	3.288	2.375	1.912	2.485	2.506	2.291	2.697	2.084	2.339	2.722
LO PD with diphasic dyskinetic	2	60	16	subject006	2.369	2.993	2.513	1.885	3.264	2.592	2.337	2.752	2.361	2.244	2.532	1.974	2.398	2.743	2.843	2.521	2.42	2.718	2.55	1.757	2.058	2.693	2.556	2.251	2.67	2.402	2.638	2.094	2.683	2.319	2.502	3.4	2.248	2.779	2.346	3.08	2.396	1.938	3.52	2.533	2.332	2.605	2.298	2.097	2.491
EO PD with diphasic dyskinetic	2	54	6	subject007	2.549	2.688	2.288	1.841	2.977	2.562	2.425	2.797	2.335	2.068	2.487	1.784	2.355	2.765	2.152	2.349	2.343	2.543	2.155	1.732	2.059	2.688	2.413	2.239	2.599	2.192	2.586	2.101	2.669	2.503	3.293	3.203	2.57	2.924	2.423	2.667	2.301	1.926	3.57	2.64	2.426	2.739	2.012	2.234	2.447
LO PD with diphasic dyskinetic	1	55	12	subject008	2.456	2.582	2.478	1.72	3.236	2.352	2.207	2.628	2.22	2.039	2.48	1.834	2.324	2.694	2.133	2.486	2.541	2.46	2.428	1.548	2.032	2.382	2.63	2.231	2.508	2.424	2.716	2.171	2.4	2.452	2.231	3.521	2.249	2.829	2.46	2.528	2.397	1.744	3.071	2.544	2.373	2.753	2.391	2.199	2.563
LO PD with diphasic dyskinetic	1	65	12	subject009	2.46	2.859	2.549	2.091	3.577	2.785	2.418	2.788	2.213	2.355	2.625	2.04	2.34	2.801	2.725	2.653	2.491	2.741	2.349	1.721	2.195	2.264	2.674	2.436	2.895	2.42	2.719	2.316	2.7	2.466	2.569	3.773	2.242	2.929	2.695	2.585	2.696	2.326	3.876	2.645	2.52	2.91	2.365	2.324	2.733
LO PD with diphasic dyskinetic	2	74	6	subject010	2.285	3.091	2.587	1.845	3.276	2.651	2.304	2.865	2.556	2.107	2.546	1.882	2.367	2.831	2.414	2.246	2.445	2.558	2.491	1.492	2.121	2.477	2.532	2.488	2.75	2.358	2.617	2.163	2.606	2.494	3.104	3.905	2.124	2.851	2.42	3.273	2.606	1.978	3.075	2.645	2.458	2.642	2.761	2.125	2.461
LO PD with diphasic dyskinetic	1	73	15	subject011	2.47	2.349	2.42	1.907	2.874	2.482	2.222	2.803	2.398	2.14	2.465	2.041	2.333	2.635	2.305	2.304	2.472	2.646	2.365	1.714	1.997	2.385	2.384	2.2	2.458	2.272	2.59	2.06	2.502	2.422	2.707	3.25	2.229	2.682	2.479	2.251	2.416	1.828	3.523	2.496	2.387	2.749	2.567	2.274	2.385
LO PD with diphasic dyskinetic	2	53	2	subject012	2.384	2.901	2.566	1.797	3.295	2.665	2.311	2.651	3.055	2.257	2.432	2.032	2.492	2.712	2.795	2.537	2.537	2.633	2.51	1.624	2.087	2.775	2.609	2.266	2.819	2.422	2.773	2.157	2.604	2.474	2.845	3.299	2.393	2.789	2.683	2.512	2.417	1.812	3.573	2.458	2.311	2.706	2.373	2.348	2.467
LO PD with diphasic dyskinetic	2	61	12	subject013	2.677	2.656	2.48	2	3.115	2.795	2.427	2.732	2.468	2.349	2.623	2.199	2.531	2.855	2.835	2.544	2.604	2.53	2.427	1.767	2.208	2.523	2.729	2.554	2.835	2.331	2.737	2.34	2.827	2.617	2.696	3.527	2.274	3.002	2.772	2.74	2.571	2.092	3.49	2.652	2.535	2.802	2.529	2.422	2.547
EO PD with diphasic dyskinetic	2	62	9	subject014	2.508	2.821	2.398	1.996	2.64	2.515	2.423	2.835	2.517	2.224	2.466	2.05	2.383	2.714	2.902	2.396	2.387	2.505	2.544	1.694	2.092	2.394	2.537	2.345	2.717	2.273	2.842	2.194	2.495	2.444	2.59	2.674	2.307	2.781	2.408	2.419	2.622	1.93	3.118	2.663	2.51	2.654	2.453	2.335	2.574
LO PD with diphasic dyskinetic	1	61	9	subject015	2.63	2.972	2.554	1.899	3.326	2.688	2.361	2.739	2.451	2.168	2.706	1.95	2.24	2.678	2.527	2.309	2.378	2.288	2.207	1.694	2.029	2.482	2.442	2.17	2.433	2.273	2.695	2.052	2.646	2.387	2.899	3.713	2.358	2.759	2.297	2.441	2.311	1.872	3.37	2.585	2.458	2.873	2.239	2.341	2.587
LO PD with diphasic dyskinetic	2	73	6	subject016	2.545	2.688	2.475	1.926	3.005	2.556	2.389	2.903	2.649	1.942	2.593	2.097	2.237	2.946	2.441	2.332	2.423	2.739	2.299	1.569	2.048	2.783	2.557	2.337	2.833	2.488	2.572	2.092	2.571	2.483	2.585	3.561	2.139	2.902	2.576	2.744	2.488	1.971	3.681	2.619	2.533	2.913	2.58	2.288	2.516
LO PD with diphasic dyskinetic	2	64	6	subject017	2.488	2.708	2.558	1.829	3.332	2.846	2.402	2.923	2.313	2.305	2.549	2.048	2.528	2.834	3.284	2.629	2.503	2.655	2.584	1.796	2.164	2.441	2.651	2.238	2.805	2.547	2.82	2.264	2.705	2.452	2.643	3.792	2.327	3.035	2.601	2.358	2.481	1.95	3.393	2.677	2.415	2.722	2.24	2.398	2.639
EO PD with diphasic dyskinetic	1	62	6	subject018	2.326	2.471	2.534	1.938	3.184	2.618	2.368	2.618	2.355	2.304	2.64	1.827	2.244	2.893	2.305	2.433	2.483	2.6	2.172	1.615	1.909	2.452	2.609	2.35	2.7	2.328	2.701	2.059	2.563	2.495	2.857	3.493	2.097	2.742	2.504	2.584	2.523	1.921	3.316	2.622	2.48	2.834	2.44	2.215	2.492
LO PD with diphasic dyskinetic	1	67	15	subject019	2.637	2.472	2.593	1.863	3.309	2.822	2.619	2.859	2.742	2.418	2.498	2.03	2.381	2.96	2.303	2.645	2.634	2.716	2.49	1.558	2.13	2.66	2.605	2.464	2.581	2.537	2.572	2.481	2.624	2.518	2.869	2.779	2.431	2.678	2.507	2.5	2.511	2.039	3.248	2.834	2.575	2.867	2.458	2.605	2.814
EO PD with diphasic dyskinetic	1	64	15	subject020	2.236	2.734	2.587	1.84	2.715	2.524	2.365	2.665	2.562	2.127	2.612	1.962	2.553	2.653	2.182	2.586	2.446	2.473	2.288	1.456	2.087	2.574	2.652	2.482	2.664	2.327	2.716	2.261	2.559	2.492	3.031	3.556	2.177	2.725	2.382	2.381	2.643	1.754	3.346	2.504	2.419	2.472	2.41	2.166	2.515
LO PD with diphasic dyskinetic	2	64	15	subject021	2.467	2.72	2.528	1.714	3.537	2.765	2.564	2.801	2.477	2.3	2.619	2.018	2.435	2.772	2.886	2.541	2.328	2.667	2.378	1.472	2.045	2.499	2.529	2.484	2.888	2.535	2.755	2.224	2.486	2.561	2.835	3.122	2.458	2.755	2.663	2.727	2.608	1.699	3.49	2.768	2.591	2.504	2.784	2.346	2.42
LO PD patients without dyskinesia	2	72	9	subject022	2.521	2.734	2.418	1.838	3.398	2.779	2.432	2.817	2.402	2.229	2.572	1.976	2.53	2.81	2.704	2.391	2.655	2.692	2.256	1.61	2.115	2.415	2.657	2.405	2.855	2.345	2.713	2.229	2.862	2.626	2.695	3.846	2.352	2.888	2.569	2.636	2.387	1.935	3.839	2.692	2.541	2.766	2.386	2.267	2.564
LO PD patients without dyskinesia	1	59	12	subject023	2.291	2.452	2.409	2.053	3.201	2.634	2.531	2.761	2.648	2.147	2.463	1.899	2.437	2.702	2.732	2.575	2.389	2.466	2.273	1.773	2.099	2.517	2.46	2.368	2.493	2.301	2.702	2.236	2.465	2.426	2.895	3.267	2.326	2.739	2.416	2.52	2.444	2.032	3.032	2.503	2.52	2.611	2.678	2.351	2.514
EO PD patients without dyskinesia	2	41	6	subject024	2.528	2.787	2.302	1.791	2.969	2.649	2.299	2.691	2.392	2.141	2.449	2.012	2.198	2.655	2.454	2.407	2.513	2.287	2.239	1.685	1.898	2.496	2.326	2.247	2.703	2.16	2.338	2.072	2.436	2.294	2.261	3.119	2.017	2.758	2.239	2.756	2.251	1.921	3.247	2.562	2.405	2.774	2.265	2.259	2.266
LO PD patients without dyskinesia	1	51	15	subject025	2.634	2.793	2.361	1.893	3.561	2.619	2.239	2.752	1.876	2.159	2.466	1.801	2.346	2.761	2.688	2.514	2.389	2.428	2.159	1.496	2.115	2.251	2.493	2.179	2.49	2.231	2.524	2.2	2.678	2.309	2.448	3.365	2.388	2.825	2.563	2.31	2.312	1.737	3.469	2.532	2.197	2.65	1.909	2.196	2.377
EO PD patients without dyskinesia	1	75	9	subject026	2.476	2.603	2.386	1.726	3.313	2.635	2.323	2.753	2.415	2.237	2.51	2	2.503	2.763	2.454	2.371	2.395	2.718	2.323	1.429	2.126	2.541	2.507	2.304	2.686	2.397	2.683	2.193	2.757	2.384	2.672	3.595	2.225	2.667	2.505	2.638	2.433	1.896	3.193	2.666	2.267	2.578	2.253	2.33	2.573
LO PD patients without dyskinesia	1	58	12	subject027	2.445	2.4	2.555	1.81	3.145	2.484	2.384	2.587	2.226	2.149	2.507	1.855	2.398	2.682	2.065	2.327	2.521	2.42	2.33	1.661	2.016	2.441	2.433	2.35	2.732	2.338	2.679	2.231	2.441	2.372	2.649	3.482	2.023	2.764	2.244	2.463	2.535	1.782	3.499	2.497	2.298	2.64	2.047	2.175	2.489
LO PD patients without dyskinesia	2	58	12	subject028	2.561	2.701	2.585	1.948	2.781	2.529	2.359	2.868	2.688	2.086	2.619	2.004	2.716	2.991	2.147	2.511	2.522	2.799	2.3	1.502	2.121	2.54	2.682	2.4	3.048	2.453	2.854	2.217	2.811	2.604	2.997	3.812	2.57	2.784	2.708	2.59	2.733	2.011	3.228	2.695	2.484	2.9	2.431	2.271	2.61
LO PD patients without dyskinesia	1	29	11	subject029	2.405	2.527	2.348	1.931	3.366	2.777	2.504	2.709	2.769	2.216	2.552	2.103	2.456	2.765	2.832	2.517	2.541	2.685	2.251	1.75	2.112	2.615	2.565	2.387	2.621	2.319	2.671	2.234	2.675	2.4	2.894	3.351	2.422	2.868	2.642	2.423	2.303	1.784	3.52	2.746	2.533	2.687	2.194	2.366	2.641
EO PD patients without dyskinesia	1	66	6	subject030	2.446	2.992	2.581	2.018	3.287	2.853	2.556	2.825	2.322	2.224	2.743	2.073	2.626	3.05	2.99	2.762	2.691	2.679	2.387	1.774	2.291	2.623	2.791	2.596	2.801	2.472	2.799	2.261	2.931	2.72	2.886	3.595	2.594	3.098	2.726	2.555	2.649	1.914	3.358	2.715	2.493	2.699	2.217	2.171	2.706
EO PD patients without dyskinesia	2	59	15	subject031	2.723	2.701	2.421	1.595	3.728	2.623	2.346	2.624	2.333	2.166	2.443	1.825	2.446	2.955	2.341	2.381	2.33	2.632	2.283	1.406	2.12	2.525	2.316	2.394	2.816	2.374	2.75	2.215	2.678	2.587	2.582	3.486	2.176	2.839	2.435	2.614	2.438	1.654	3.671	2.556	2.337	2.694	2.122	2.218	2.367
EO PD patients without dyskinesia	2	63	12	subject032	2.248	2.647	2.458	1.758	3.242	2.547	2.354	2.556	2.352	2.131	2.524	1.936	2.412	2.674	2.412	2.447	2.341	2.52	2.433	1.633	1.831	2.477	2.491	2.255	2.696	2.371	2.625	2.095	2.599	2.251	2.645	3.588	2.234	2.808	2.275	2.33	2.405	1.773	3.545	2.509	2.329	2.794	2.278	2.229	2.522
LO PD patients without dyskinesia	1	52	9	subject033	2.345	2.808	2.428	1.593	3.023	2.569	2.297	2.484	2.402	2.103	2.576	1.975	2.694	2.601	2.667	2.414	2.37	2.975	2.365	1.357	2.099	2.407	2.484	2.257	2.879	2.413	2.681	2.078	2.674	2.448	2.518	2.572	2.21	2.744	2.484	2.637	2.422	1.786	3.716	2.633	2.419	2.767	2.309	2.197	2.504
EO PD patients without dyskinesia	1	58	12	subject034	2.394	2.701	2.389	1.718	2.942	2.531	2.43	2.622	2.181	2.101	2.493	1.957	2.482	2.652	2.024	2.389	2.447	2.442	2.299	1.61	2.053	2.531	2.453	2.368	2.875	2.398	2.672	2.19	2.628	2.528	2.977	2.855	2.077	2.736	2.425	2.782	2.443	1.724	2.934	2.42	2.487	2.548	2.225	2.206	2.496
LO PD with diphasic dyskinetic	2	69	2	subject035	2.491	2.431	2.447	1.654	2.952	2.576	2.267	2.64	2.211	2.034	2.408	1.937	2.293	2.662	2.229	2.363	2.282	2.237	2.292	1.528	2.043	2.465	2.462	2.244	2.434	2.308	2.605	2.19	2.481	2.436	3.053	3.348	2.273	2.57	2.583	2.545	2.497	1.693	2.828	2.43	2.28	2.754	1.94	2.192	2.429
EO PD with diphasic dyskinetic	1	47	9	subject036	2.277	2.695	2.332	1.766	2.845	2.443	2.097	2.56	2.314	1.995	2.728	1.848	2.175	2.497	1.96	2.328	2.206	2.893	2.119	1.485	1.819	2.283	2.252	2.152	2.418	2.415	2.56	1.958	2.377	2.069	2.756	3.279	2.158	2.577	2.292	2.627	2.33	1.667	2.834	2.476	2.29	2.655	2.194	2.082	2.615
EO PD with diphasic dyskinetic	1	49	15	subject037	2.72	2.693	2.509	1.973	2.725	2.609	2.468	2.74	2.222	2.233	2.622	2.112	2.564	2.821	2.666	2.444	2.599	2.551	2.448	1.745	2.104	2.511	2.487	2.359	2.739	2.354	2.762	2.214	2.736	2.532	3.009	3.103	1.989	2.845	2.744	2.584	2.332	2.039	3.009	2.648	2.473	2.554	2.255	2.312	2.69
EO PD with diphasic dyskinetic	1	68	15	subject038	2.445	2.741	2.366	1.649	3.142	2.546	2.215	2.686	2.077	2.108	2.376	1.94	2.469	2.627	2.649	2.393	2.372	2.139	2.175	1.723	1.849	2.306	2.449	2.156	2.603	2.182	2.548	2.065	2.549	2.346	2.555	3.375	2.11	2.806	2.599	2.411	2.403	1.809	2.901	2.483	2.331	2.499	2.363	2.1	2.55
LO PD with diphasic dyskinetic	2	66	9	subject039	2.333	2.516	2.517	1.894	3.608	2.603	2.505	2.795	2.386	2.346	2.618	1.998	2.601	2.858	2.506	2.522	2.642	2.816	2.546	1.518	2.058	2.385	2.598	2.442	3.13	2.501	2.715	2.196	2.684	2.638	3.011	3.229	2.425	2.993	2.339	2.322	2.594	1.869	2.917	2.716	2.518	2.794	2.282	2.279	2.46
LO PD with diphasic dyskinetic	2	34	18	subject040	2.508	2.651	2.584	1.862	3.43	2.68	2.34	2.891	2.609	2.07	2.502	1.922	2.506	3.042	2.33	2.27	2.609	2.514	2.541	1.533	1.943	2.586	2.498	2.344	2.837	2.35	2.652	2.111	2.869	2.523	2.694	3.944	1.982	2.893	2.531	2.258	2.289	1.996	3.403	2.802	2.362	2.784	2.428	2.18	2.494
EO PD with diphasic dyskinetic	1	78	16	subject041	2.327	2.725	2.487	1.897	3.084	2.562	2.359	2.442	2.145	2.107	2.66	1.865	2.404	2.774	2.564	2.364	2.476	2.784	2.307	1.436	1.993	2.364	2.488	2.284	2.978	2.212	2.74	2.191	2.548	2.43	2.941	3.74	2.214	2.775	2.424	2.629	2.211	1.795	3.262	2.669	2.301	2.574	2.29	2.121	2.601
EO PD with diphasic dyskinetic	1	65	12	subject042	2.553	2.745	2.419	1.745	3.575	2.798	2.389	2.855	2.364	2.165	2.676	1.953	2.583	2.834	2.331	2.095	2.661	2.612	2.511	1.435	2.014	2.484	2.448	2.187	2.605	2.412	2.685	2.044	2.845	2.462	3.289	4.03	2.257	3.098	2.496	2.661	2.527	1.909	3.442	2.709	2.362	2.975	2.41	2.319	2.639
LO PD with diphasic dyskinetic	2	67	2	subject043	2.994	2.734	2.674	1.85	3.229	2.762	2.665	3.14	2.411	2.32	2.509	2.117	2.655	2.866	2.342	2.604	2.746	2.826	2.45	1.526	2.066	2.506	2.669	2.482	2.832	2.666	2.828	2.329	2.817	2.772	2.897	3.609	2.314	2.76	2.764	2.625	2.609	1.887	3.699	2.826	2.674	3.032	2.107	2.372	2.738
LO PD with diphasic dyskinetic	1	55	9	subject044	2.521	2.738	2.509	1.93	3.435	2.571	2.357	2.664	2.3	2.292	2.643	1.864	2.376	2.7	2.614	2.565	2.551	2.573	2.357	1.604	1.928	2.622	2.578	2.293	2.815	2.397	2.656	2.208	2.694	2.435	2.532	3.753	2.108	2.801	2.715	3.477	2.4	1.83	3.617	2.765	2.564	2.764	2.245	2.397	2.652
LO PD with diphasic dyskinetic	2	53	12	subject045	2.331	2.694	2.455	1.809	3.766	2.578	2.409	2.861	2.412	2.137	2.433	2.104	2.387	2.809	2.437	2.235	2.273	2.465	2.312	1.628	1.978	2.561	2.559	2.181	3.135	2.325	2.604	2.101	2.576	2.36	2.566	3.425	2.049	3.117	2.518	2.303	2.472	1.759	3.492	2.653	2.315	2.785	2.181	2.303	2.499
EO PD with diphasic dyskinetic	2	48	9	subject046	2.469	2.559	2.512	1.674	3.697	2.769	2.436	2.85	2.292	2.287	2.625	2.078	2.43	2.868	2.146	2.566	2.533	2.698	2.598	1.457	1.911	2.586	2.518	2.434	3.104	2.45	2.802	2.148	2.65	2.561	2.783	3.842	2.437	3.097	2.751	2.587	2.707	1.867	3.726	2.747	2.5	2.775	2.179	2.296	2.738
LO PD with diphasic dyskinetic	2	79	12	subject047	2.375	2.629	2.61	1.81	3.64	2.929	2.396	2.841	2.327	2.299	2.759	2.042	2.409	2.999	2.656	2.237	2.619	2.651	2.297	1.661	2.088	2.552	2.706	2.347	2.622	2.388	2.78	2.151	2.749	2.438	3.051	3.641	2.616	3.028	2.546	2.516	2.463	1.849	3.769	2.865	2.406	2.787	2.166	2.209	2.766
LO PD with diphasic dyskinetic	2	52	9	subject048	2.573	2.581	2.56	1.764	3.283	2.604	2.5	2.973	2.389	2.255	2.703	1.94	2.366	2.718	2.087	2.294	2.457	2.883	2.356	1.619	2.094	2.481	2.523	2.323	2.977	2.519	2.781	2.143	2.526	2.597	2.677	3.434	2.168	2.738	2.34	2.614	2.471	1.915	3.588	2.719	2.532	2.869	2.347	2.208	2.829
EO PD with diphasic dyskinetic	1	60	9	subject049	2.341	2.799	2.603	1.755	3.496	2.658	2.395	2.643	2.36	2.077	2.535	1.818	2.406	2.743	2.484	2.299	2.551	2.694	2.386	1.419	2.021	2.51	2.62	2.274	2.69	2.465	2.772	2.058	2.722	2.552	2.747	3.624	2.063	2.989	2.539	2.624	2.522	1.742	3.654	2.589	2.433	2.618	2.277	2.191	2.651
EO PD with diphasic dyskinetic	1	58	9	subject050	2.336	2.824	2.275	1.722	3.579	2.583	2.244	2.624	2.227	1.989	2.235	1.796	2.313	2.727	2.543	2.136	2.435	2.506	2.291	1.578	1.891	2.289	2.351	2.121	2.549	2.253	2.388	1.919	2.594	2.262	2.102	3.486	1.945	2.875	2.27	2.851	2.174	1.687	3.452	2.487	2.273	2.349	2.326	2.004	2.22
LO PD with diphasic dyskinetic	1	56	15	subject051	2.489	2.744	2.365	1.791	3.184	2.66	2.305	2.997	2.038	2.186	2.697	1.716	2.358	2.715	2.488	2.109	2.54	2.638	2.378	1.583	2.037	2.561	2.504	2.266	3.072	2.351	2.7	2.093	2.812	2.366	2.55	3.638	2.201	3.114	2.5	3.031	2.357	1.655	3.484	2.635	2.374	2.886	2.203	2.117	2.639
LO PD with diphasic dyskinetic	2	71	9	subject052	2.395	2.756	2.137	1.817	3.346	2.653	2.345	2.674	2.204	2.094	2.533	1.92	2.44	2.894	2.934	2.174	2.447	2.852	2.45	1.556	2.056	2.572	2.474	2.164	2.635	2.238	2.475	2.02	2.472	2.429	2.677	3.267	2.006	2.706	2.568	3.04	2.435	1.606	3.313	2.496	2.224	2.766	1.983	2.112	2.355
EO PD with diphasic dyskinetic	2	54	12	subject053	2.517	2.708	2.53	1.799	3.553	2.687	2.501	2.743	2.308	2.306	2.716	1.959	2.445	2.9	2.59	2.404	2.399	2.848	2.596	1.578	1.979	2.554	2.57	2.361	3.2	2.481	2.79	2.207	2.84	2.587	3.271	3.729	2.22	2.984	2.479	2.915	2.536	1.908	3.464	2.705	2.445	2.73	2.4	2.268	2.609
LO PD with diphasic dyskinetic	1	62	12	subject054	2.534	2.389	2.351	1.773	2.885	2.611	2.349	2.695	2.557	2.072	2.591	1.921	2.508	2.704	2.424	2.126	2.678	2.553	2.255	1.556	2.354	2.428	1.886	2.312	2.836	2.371	2.662	2.085	2.665	2.483	2.421	3.508	1.866	2.69	2.716	2.774	2.274	1.646	3.407	2.681	2.346	2.712	2.764	2.035	2.636
LO PD with diphasic dyskinetic	1	66	6	subject055	2.213	2.705	2.304	1.713	3.329	2.49	2.238	2.67	2.295	2.172	2.557	1.83	2.587	2.677	2.223	2.296	2.354	2.535	2.278	1.522	2.003	2.537	2.397	2.225	2.744	2.301	2.656	1.973	2.51	2.355	2.507	3.417	1.891	2.77	2.148	2.619	2.384	1.698	3.671	2.583	2.193	2.72	2.318	2.14	2.706
LO PD with diphasic dyskinetic	1	61	9	subject056	2.284	2.856	2.445	1.928	3.531	2.396	2.225	2.719	2.16	1.979	2.483	1.856	2.478	2.792	2.008	2.125	2.596	2.491	2.177	1.525	1.935	2.073	2.382	2.186	2.618	2.207	2.612	1.919	2.436	2.304	2.613	3.578	1.933	3.002	2.435	3.024	2.576	1.789	3.946	2.463	2.143	2.682	2.235	2.031	2.266
EO PD with diphasic dyskinetic	1	44	9	subject057	2.274	2.582	2.113	1.804	3.327	2.583	2.196	2.498	2.37	2.064	2.216	1.932	2.273	2.355	2.721	2.099	2.134	2.121	2.144	1.642	1.932	2.245	2.299	2.146	2.372	2.208	2.489	1.965	2.459	2.208	2.582	2.945	1.822	2.58	2.3	1.956	2.244	1.609	3.064	2.64	2.235	2.521	1.939	2.005	2.478
EO PD with diphasic dyskinetic	1	56	9	subject058	2.562	2.492	2.411	1.913	3.64	2.686	2.662	2.934	2.502	2.415	2.316	2.027	2.337	2.855	2.878	2.439	2.514	2.805	2.306	1.743	2.055	2.312	2.488	2.461	2.476	2.191	2.466	2.378	2.792	2.518	2.486	3.666	2.296	2.853	2.288	2.317	2.369	1.989	3.717	2.754	2.619	2.601	2.449	2.491	2.451
EO PD with diphasic dyskinetic	1	54	12	subject059	2.561	2.783	2.626	2.16	3.334	2.84	2.571	2.808	2.54	2.285	2.508	2.033	2.525	2.87	2.719	3.025	2.72	2.894	2.44	1.842	2.267	2.543	2.858	2.663	3.198	2.225	2.807	2.462	2.767	2.633	2.365	3.777	2.734	2.959	2.761	2.337	2.49	2.098	3.666	2.901	2.55	3.046	2.593	2.299	2.441
LO PD with diphasic dyskinetic	2	62	15	subject060	2.193	2.906	2.316	1.857	3.385	2.515	2.328	2.647	2.371	2	2.444	1.826	2.251	2.689	2.089	2.476	2.323	2.421	2.157	1.646	1.963	2.361	2.644	2.203	2.637	2.077	2.43	2.136	2.506	2.363	2.246	3.164	2.392	2.742	2.594	2.382	2.22	1.872	3.253	2.494	2.346	2.59	2.077	2.09	2.361
EO PD with diphasic dyskinetic	2	51	9	subject061	2.455	3.121	2.49	1.751	4.115	2.745	2.185	2.728	2.537	1.993	2.498	1.873	2.324	2.695	2.473	2.612	2.507	2.224	2.195	1.464	2.144	2.63	2.589	2.418	2.672	2.296	2.794	2.192	2.727	2.4	2.179	3.686	2.452	2.634	2.344	2.62	2.248	1.793	3.77	2.684	2.305	2.741	2.654	2.037	2.359
LO PD patients without dyskinesia	2	64	12	subject062	2.382	2.58	2.477	1.937	3.609	2.666	2.326	2.799	2.343	2.091	2.508	1.919	2.243	3.005	2.571	2.334	2.396	2.747	2.34	1.523	2.152	2.167	2.565	2.286	2.634	2.362	2.554	2.136	2.68	2.39	2.728	3.5	2.069	2.691	2.395	2.47	2.4	1.858	3.358	2.745	2.323	2.704	2.396	2.191	2.418
EO PD patients without dyskinesia	1	57	16	subject063	2.526	2.535	2.372	1.95	3.249	2.756	2.377	2.949	2.742	2.201	2.517	1.993	2.316	2.893	2.608	2.312	2.489	2.394	2.269	1.642	1.894	2.475	2.48	2.322	2.694	2.165	2.379	2.163	2.534	2.441	2.361	3.39	1.946	2.758	2.481	2.904	2.369	1.817	3.36	2.72	2.477	2.99	2.479	2.461	2.385
LO PD patients without dyskinesia	2	66	9	subject064	2.467	2.663	2.31	1.916	3.616	2.676	2.319	2.856	2.471	2.155	2.544	2.04	2.462	2.775	2.617	2.056	2.433	2.659	2.447	1.568	1.805	2.515	2.286	2.239	2.828	2.253	2.575	2.082	2.625	2.418	2.972	3.534	2.577	2.508	2.434	2.654	2.431	1.867	3.588	2.667	2.371	2.607	2.473	2.252	2.623
LO PD patients without dyskinesia	2	65	6	subject065	2.422	2.733	2.597	1.87	2.902	2.694	2.566	3.077	2.534	2.485	2.647	1.945	2.22	2.941	2.059	2.137	2.401	2.975	2.841	1.681	2.37	2.501	2.448	2.322	2.509	2.553	2.606	2.248	2.618	2.859	2.93	3.422	2.321	2.983	2.509	2.766	2.416	1.82	3.7	2.586	2.417	2.571	2.319	2.332	2.537
LO PD patients without dyskinesia	1	65	15	subject066	2.559	2.646	2.5	1.609	3.111	2.473	2.37	2.52	2.088	2.122	2.335	1.892	2.197	2.727	2.512	2.045	2.498	2.856	2.398	1.364	2.009	2.27	2.422	2.179	2.545	2.362	2.644	2.115	2.727	2.498	3.077	3.34	1.96	2.668	2.191	2.722	2.45	1.715	3.454	2.398	2.37	2.714	2.147	2.122	2.38
EO PD patients without dyskinesia	2	52	9	subject067	2.677	3.326	2.724	1.757	3.035	2.608	2.484	2.808	2.524	2.212	2.517	1.863	2.374	2.868	2.354	2.561	2.614	2.761	2.441	1.495	2.103	2.509	2.687	2.459	2.97	2.436	2.737	2.262	2.825	2.531	2.667	3.187	2.589	2.805	2.704	2.906	2.748	1.943	3.514	2.78	2.471	2.714	2.68	2.289	2.552
EO PD patients without dyskinesia	2	44	9	subject068	2.362	3.164	2.446	1.919	3.517	2.692	2.505	2.854	2.152	2.196	2.443	1.775	2.334	2.789	2.768	2.403	2.496	2.284	2.179	1.522	2.063	2.485	2.674	2.371	2.679	2.204	2.652	2.351	2.502	2.448	2.734	3.699	1.941	2.973	2.514	2.585	2.349	1.779	4.07	2.563	2.467	2.719	2.25	2.191	2.776
LO PD patients without dyskinesia	2	62	6	subject069	2.547	2.95	2.671	1.71	3.72	2.725	2.556	2.834	2.545	2.105	2.659	1.882	2.501	2.974	2.446	2.537	2.576	2.29	2.343	1.543	2.111	2.588	2.816	2.444	2.826	2.494	2.755	2.175	2.74	2.583	2.576	3.761	2.292	3.297	2.801	3.012	2.739	1.781	4.011	2.831	2.542	2.969	2.564	2.303	2.5
LO PD patients without dyskinesia	1	67	16	subject070	2.481	2.526	2.507	1.874	3.51	2.523	2.27	2.635	2.153	2.128	2.629	1.887	2.314	2.767	2.272	2.03	2.475	2.608	2.19	1.438	1.88	2.288	2.475	2.118	2.678	2.218	2.465	1.867	2.354	2.236	2.251	3.213	2.04	2.858	2.235	2.59	2.318	1.806	3.758	2.44	2.258	2.582	2.105	2.208	2.692
LO PD patients without dyskinesia	2	65	9	subject071	2.405	2.322	2.522	1.833	3.139	2.512	2.349	2.678	2.408	2.151	2.658	1.838	2.478	2.89	2.323	2.308	2.387	2.438	2.308	1.625	1.848	2.531	2.47	2.355	2.682	2.132	2.623	2.136	2.673	2.371	2.952	3.522	2.289	2.849	2.485	2.604	2.493	1.896	3.68	2.548	2.21	2.632	2.295	2.08	2.593
LO PD patients without dyskinesia	2	62	9	subject072	2.445	2.714	2.512	1.699	3.134	2.617	2.297	2.821	2.261	2.044	2.582	1.808	2.479	2.808	2.274	2.087	2.762	2.749	2.483	1.581	1.818	2.262	2.562	2.249	2.895	2.465	2.696	1.918	2.44	2.414	2.816	3.861	1.943	3.002	2.44	2.519	2.412	1.699	3.528	2.546	2.273	2.738	2.237	2.217	2.679
LO PD patients without dyskinesia	1	61	18	subject073	2.251	2.503	2.525	1.677	3.432	2.431	2.386	2.793	1.979	2.339	2.674	1.806	2.486	2.717	2.446	1.998	2.535	2.89	2.397	1.496	2.047	2.338	2.405	2.164	2.528	2.251	2.623	2.034	2.586	2.532	2.474	3.422	1.957	2.795	2.511	2.491	2.22	1.938	3.308	2.349	2.487	2.52	2.131	2.299	2.515
LO PD patients without dyskinesia	2	74	9	subject074	2.342	2.976	2.492	1.847	3.248	2.615	2.44	2.701	2.768	1.976	2.761	1.761	2.297	2.777	1.922	2.358	2.527	2.769	2.396	1.495	1.947	2.725	2.488	2.308	2.974	2.265	2.69	2.179	2.703	2.626	2.791	3.782	1.92	2.709	2.456	2.736	2.334	1.702	3.552	2.561	2.355	2.652	2.393	2.111	2.586
LO PD patients without dyskinesia	2	67	9	subject075	2.288	2.329	2.451	1.693	3.306	2.317	2.235	2.599	1.962	2.055	2.466	1.763	2.39	2.739	2.342	2.264	2.296	2.629	2.324	1.555	1.99	2.312	2.465	2.138	2.753	2.272	2.704	2.039	2.545	2.401	2.709	3.412	2.299	2.773	2.42	2.642	2.642	1.734	3.327	2.445	2.411	2.614	2.044	2.09	2.368
LO PD patients without dyskinesia	2	60	9	subject076	2.348	2.473	2.537	1.782	3.518	2.654	2.395	2.645	2.151	2.085	2.33	2.033	2.348	2.516	2.36	2.591	2.36	2.397	2.243	1.634	2.069	2.365	2.524	2.168	2.668	2.289	2.68	2.232	2.455	2.459	2.44	2.957	2.43	2.808	2.495	2.185	2.463	1.906	3.135	2.606	2.418	2.598	2.119	2.091	2.411
LO PD patients without dyskinesia	2	60	9	subject077	2.616	2.833	2.545	1.976	3.324	2.735	2.469	2.782	2.492	2.067	2.653	2.086	2.546	2.94	2.059	2.409	2.538	2.536	2.539	1.792	2.105	2.415	2.737	2.32	2.635	2.335	2.654	2.339	2.704	2.517	2.783	3.435	2.386	2.862	2.927	2.577	2.572	2.002	3.569	2.822	2.484	2.699	2.187	2.16	2.686
LO PD patients without dyskinesia	2	65	6	subject078	2.176	2.576	2.415	1.843	3.294	2.606	2.428	2.668	2.071	2.122	2.46	2.058	2.244	2.587	2.695	2.51	2.288	2.429	2.286	1.694	2.106	2.372	2.585	2.407	2.607	2.087	2.608	2.279	2.578	2.498	2.72	3.147	2.364	2.774	2.374	2.557	2.373	1.938	3.836	2.699	2.435	2.596	2.367	2.226	2.522
LO PD patients without dyskinesia	2	65	12	subject079	2.502	2.583	2.462	1.964	3.558	2.705	2.355	2.737	2.056	2.185	2.373	2.057	2.384	2.818	2.566	2.386	2.425	2.523	2.186	1.659	2.043	2.416	2.507	2.374	2.772	2.31	2.444	2.212	2.499	2.438	2.474	3.577	2.173	2.817	2.526	2.452	2.379	1.861	3.387	2.64	2.496	2.615	2.412	2.266	2.475
LO PD patients without dyskinesia	1	60	12	subject080	2.462	2.726	2.33	1.963	3.764	2.682	2.35	2.694	2.408	2.228	2.48	2	2.465	2.862	2.87	2.47	2.438	2.608	2.257	1.618	2.124	2.525	2.39	2.349	2.568	2.284	2.661	2.145	2.629	2.52	2.471	3.292	2.598	2.846	2.694	2.612	2.441	1.801	4.239	2.714	2.382	2.746	2.41	2.265	2.543
EO PD patients without dyskinesia	1	57	9	subject081	2.452	2.36	2.533	1.868	3.392	2.698	2.386	2.726	2.305	2.274	2.639	2.033	2.383	2.677	2.407	2.261	2.48	2.686	2.574	1.515	2.125	2.614	2.455	2.31	2.698	2.457	2.605	2.085	2.543	2.573	2.723	3.616	2.179	2.673	2.544	2.549	2.609	1.908	2.735	2.667	2.428	2.779	2.444	2.206	2.528
LO PD patients without dyskinesia	1	72	12	subject082	2.47	1.733	2.279	2.018	2.834	2.6	2.396	2.818	2.015	2.289	2.363	1.909	2.046	2.811	2.19	2.187	2.175	2.498	2.139	1.727	2.022	2.306	2.279	2.338	2.434	2.129	2.493	2.129	2.497	2.422	2.701	3.278	2.139	2.658	2.367	2.132	2.017	1.831	2.871	2.538	2.367	2.687	1.993	2.303	2.369
LO PD patients without dyskinesia	1	73	17	subject083	2.336	2.492	2.633	1.83	3.315	2.424	2.326	2.697	2.308	2.077	2.519	1.695	2.358	2.819	1.952	2.521	2.395	2.681	2.114	1.529	2.24	2.374	2.565	2.117	2.699	2.297	2.645	2.136	2.595	2.359	2.801	3.535	1.975	2.801	2.11	2.292	2.369	1.79	3.007	2.433	2.363	2.549	2.273	2.057	2.647
LO PD patients without dyskinesia	1	73	20	subject084	2.491	2.401	2.165	1.814	3.231	2.83	2.28	2.61	2.569	2.146	2.728	2.578	2.545	2.656	2.632	2.521	2.345	2.246	2.574	2.049	2.013	2.697	2.333	2.239	2.997	2.275	2.439	2.12	2.396	2.45	3.365	2.495	2.285	2.897	2.438	2.646	2.306	2.117	2.584	2.663	2.284	2.724	2.392	2.371	3.183
LO PD patients without dyskinesia	1	78	16	subject085	2.323	2.553	2.466	1.853	3.279	2.539	2.329	2.625	2.404	2.157	2.698	1.919	2.486	2.742	1.833	2.536	2.495	2.628	2.449	1.372	2.067	2.507	2.48	2.334	2.621	2.199	2.569	2.118	2.425	2.309	2.537	3.291	2.225	2.67	2.453	2.579	2.466	1.863	3.166	2.602	2.383	2.584	2.357	2.2	2.599
LO PD patients without dyskinesia	1	78	15	subject086	2.615	2.94	2.558	1.813	3.606	2.691	2.327	2.746	2.376	2.173	2.747	2.111	2.368	2.962	2.684	2.48	2.682	2.736	2.538	1.559	2.326	2.598	2.516	2.341	2.676	2.514	2.795	2.144	2.764	2.576	3.113	3.74	2.165	3.009	2.667	2.824	2.671	1.876	2.95	2.463	2.431	2.791	2.097	2.339	2.809
LO PD patients without dyskinesia	2	72	8	subject087	2.232	2.697	2.401	2.03	2.954	2.55	2.335	2.512	2.029	2.225	2.398	1.966	2.415	2.588	2.227	2.41	2.528	2.79	2.38	1.693	2.092	2.432	2.457	2.206	2.702	2.403	2.665	2.125	2.456	2.506	2.478	2.827	2.199	2.975	2.17	2.669	2.406	1.828	3.227	2.658	2.379	2.526	2.134	2.277	2.568
LO PD patients without dyskinesia	2	64	9	subject088	2.322	2.664	2.461	1.721	3.331	2.552	2.675	2.549	2.627	2.064	2.482	1.808	2.302	2.65	2.76	2.437	2.258	2.495	2.24	1.415	2.177	2.627	2.569	2.372	2.867	2.379	2.788	2.325	2.544	2.502	2.645	3.463	1.846	2.569	2.416	2.403	2.546	1.88	3.393	2.581	2.593	2.672	2.61	2.286	2.387
LO PD patients without dyskinesia	1	72	12	subject089	2.293	2.418	2.447	1.793	3.106	2.586	2.187	2.714	2.447	2.066	2.456	1.854	2.223	2.756	2.514	2.295	2.36	2.527	2.281	1.422	2.007	2.327	2.468	2.099	2.405	2.292	2.658	1.994	2.546	2.343	2.794	3.602	2.005	2.376	2.238	2.453	2.316	1.768	2.984	2.485	2.237	2.688	2.278	2.119	2.507
LO PD patients without dyskinesia	1	61	9	subject090	2.316	2.867	2.422	1.787	3.454	2.684	2.527	2.709	2.414	2.351	2.357	1.983	2.25	2.793	2.658	2.245	2.297	2.587	2.294	1.561	1.921	2.632	2.449	2.343	2.562	2.268	2.621	2.166	2.561	2.405	2.461	3.388	2.362	2.747	2.554	2.923	2.56	1.903	3.724	2.515	2.513	2.689	2.345	2.337	2.563
LO PD patients without dyskinesia	2	67	9	subject091	2.488	2.937	2.655	1.854	3.083	2.674	2.44	2.711	2.15	2.251	2.71	2	2.358	2.967	2.328	2.57	2.455	2.456	2.384	1.599	2.052	2.496	2.566	2.381	2.484	2.355	2.675	2.169	2.618	2.417	2.87	3.619	2.195	2.931	2.434	2.484	2.388	1.928	3.481	2.677	2.53	2.855	2.422	2.457	2.506
LO PD patients without dyskinesia	1	65	12	subject092	2.178	2.705	2.499	1.809	3.196	2.724	2.2	2.834	2.567	2.201	2.521	2.114	2.31	2.656	2.165	2.452	2.423	2.462	2.357	1.469	2.086	2.503	2.56	2.32	2.483	2.3	2.502	2.12	2.657	2.271	2.712	3.27	2.529	2.979	2.625	2.59	2.482	1.774	3.203	2.729	2.278	2.798	2.565	2.224	2.613
LO PD patients without dyskinesia	1	85	16	subject093	2.227	2.773	2.255	1.849	2.843	2.573	2.363	2.598	2.143	2.178	2.364	1.868	2.412	2.551	2.14	2.315	2.39	2.514	2.205	1.529	2.031	2.426	2.392	2.296	2.521	2.126	2.469	2.154	2.477	2.286	2.55	3.354	1.913	2.637	2.336	2.628	2.297	1.844	2.39	2.416	2.279	2.53	2.175	2.236	2.318
EO PD patients without dyskinesia	2	53	12	subject094	2.488	2.459	2.487	1.706	3.573	2.727	2.433	2.829	2.438	2.288	2.459	1.942	2.385	2.958	2.528	2.322	2.471	2.47	2.465	1.397	2.097	2.531	2.561	2.268	2.591	2.404	2.637	2.2	2.645	2.434	2.344	3.42	2.378	2.755	2.611	2.488	2.434	1.753	3.756	2.716	2.396	2.638	2.72	2.353	2.645
EO PD patients without dyskinesia	1	48	9	subject095	2.68	2.378	2.19	1.798	3.351	2.664	2.42	2.764	2.361	2.422	2.555	2.034	2.376	2.93	2.565	2.302	2.437	2.556	2.284	1.465	2.192	2.711	2.466	2.317	2.435	2.197	2.396	2.08	2.629	2.444	2.816	3.502	2.156	2.819	2.488	2.48	2.196	1.85	3.385	2.735	2.49	2.712	2.441	2.427	2.686
EO PD patients without dyskinesia	2	46	12	subject096	2.801	2.579	2.364	1.727	2.789	2.787	2.508	2.839	2.278	2.208	2.51	1.926	2.448	2.862	2.584	2.423	2.5	2.531	2.401	1.417	2.117	2.485	2.443	2.341	3.001	2.415	2.54	2.169	2.969	2.627	2.776	3.56	2.425	2.886	2.403	2.594	2.303	1.969	3.285	2.703	2.55	2.822	2.33	2.271	2.622
LO PD patients without dyskinesia	2	61	12	subject097	2.229	2.775	2.253	1.847	2.844	2.571	2.366	2.597	2.141	2.177	2.36	1.862	2.41	2.554	2.146	2.314	2.391	2.515	2.207	1.532	2.027	2.425	2.395	2.294	2.519	2.124	2.466	2.159	2.451	2.282	2.57	3.358	1.915	2.634	2.341	2.629	2.296	1.838	2.392	2.421	2.276	2.528	2.177	2.238	2.315
LO PD patients without dyskinesia	2	64	9	subject098	2.59	3.25	2.46	2.062	3.256	2.702	2.431	2.834	2.39	2.249	2.609	1.996	2.627	2.747	2.859	2.42	2.496	2.707	2.293	1.445	2.039	2.585	2.567	2.359	2.978	2.405	2.719	2.195	2.513	2.525	2.855	3.861	2.243	2.967	2.51	3.245	2.518	1.912	3.23	2.559	2.42	2.622	2.533	2.243	2.651
LO PD patients without dyskinesia	1	62	12	subject099	2.251	2.658	2.327	1.868	3.332	2.515	2.294	2.692	2.371	2.183	2.438	1.937	2.389	2.607	2.632	2.339	2.488	2.444	2.161	1.643	2.077	2.377	2.459	2.339	2.884	2.303	2.51	2.178	2.737	2.234	2.888	3.581	2.32	2.652	2.36	2.151	2.334	1.878	3.317	2.484	2.344	2.642	2.229	2.218	2.415
EO PD patients without dyskinesia	1	46	6	subject100	2.59	2.618	2.422	1.804	3.095	2.551	2.31	2.675	2.136	2.142	2.484	1.969	2.379	2.882	2.558	2.283	2.462	2.378	2.26	1.498	1.999	2.378	2.481	2.287	2.419	2.239	2.523	2.102	2.734	2.326	2.467	3.36	2.242	2.548	2.44	2.224	2.261	1.828	2.99	2.594	2.35	2.852	2.061	2.137	2.499
LO PD patients without dyskinesia	1	76	17	subject101	2.323	2.508	2.369	1.685	3.37	2.438	2.332	2.627	2.694	2.069	2.395	1.831	2.082	2.674	2.469	2.359	2.501	2.317	2.21	1.448	1.983	2.432	2.453	2.177	2.531	2.243	2.539	2.005	2.466	2.327	2.612	3.009	1.91	2.741	2.455	2.474	2.337	1.571	3.298	2.293	2.354	2.543	2.305	2.109	2.484
EO PD patients without dyskinesia	1	56	16	subject102	2.393	2.538	2.501	1.866	3.203	2.597	2.468	2.608	2.441	2.193	2.412	2.059	2.274	2.625	2.615	2.424	2.318	2.298	2.357	1.551	2.123	2.501	2.494	2.369	2.584	2.153	2.608	2.2	2.52	2.512	2.652	3.217	2.115	2.831	2.353	2.316	2.377	1.945	3.112	2.595	2.407	2.649	2.028	2.254	2.539
LO PD patients without dyskinesia	2	60	9	subject103	2.494	2.773	2.474	1.845	3.098	2.666	2.35	2.687	2.225	2.256	2.534	2.083	2.376	2.6	2.448	2.306	2.481	2.436	2.224	1.455	2.021	2.413	2.443	2.34	2.511	2.301	2.657	2.194	2.709	2.444	2.832	3.665	2.162	2.738	2.428	2.543	2.311	1.788	2.682	2.459	2.411	2.55	2.567	2.258	2.424
LO PD patients without dyskinesia	1	71	9	subject104	2.679	2.596	2.655	2.158	2.979	2.8	2.576	2.856	2.167	2.286	2.754	1.984	2.497	2.788	2.039	2.418	2.534	2.633	2.369	1.717	2.117	1.853	2.824	2.5	2.475	2.426	2.865	2.431	2.595	2.56	3.025	3.462	2.183	2.837	2.595	2.641	2.621	1.985	2.89	2.743	2.491	2.937	2.099	2.345	2.518
LO PD patients without dyskinesia	1	69	9	subject105	2.441	2.402	2.42	1.576	3.712	2.615	2.379	2.813	2.166	2.163	2.583	1.776	2.456	2.828	2.078	2.332	2.415	2.709	2.493	1.486	2.096	2.614	2.471	2.367	2.375	2.405	2.71	2.157	2.651	2.455	2.725	3.829	2.061	2.839	2.52	2.741	2.327	1.805	3.471	2.615	2.317	2.799	2.041	2.22	2.655
EO PD patients without dyskinesia	1	54	9	subject106	2.5	2.377	2.498	1.911	3.305	2.674	2.328	2.775	2.675	2.124	2.482	2.079	2.359	2.748	2.313	2.586	2.504	2.963	2.354	1.766	2.017	2.623	2.557	2.341	2.713	2.378	2.692	2.114	2.502	2.507	3.107	3.255	2.104	2.715	2.59	2.544	2.492	1.784	3.016	2.66	2.442	2.756	2.523	2.306	2.532
LO PD patients without dyskinesia	1	61	12	subject107	2.535	2.443	2.592	1.808	3.077	2.6	2.503	2.608	2.381	2.219	2.694	1.921	2.515	2.776	2.144	2.524	2.603	2.561	2.33	1.673	2.098	2.458	2.647	2.428	2.906	2.476	2.887	2.356	2.509	2.443	2.889	3.758	2.096	2.792	2.392	2.633	2.718	1.811	3.21	2.665	2.472	2.852	2.109	2.157	2.724
LO PD patients without dyskinesia	1	61	6	subject108	2.607	3.133	2.724	1.939	3.406	2.755	2.392	2.837	2.588	2.249	2.657	2.031	2.503	2.954	2.734	2.444	2.528	2.581	2.443	1.595	2.088	2.805	2.654	2.416	2.788	2.521	2.766	2.157	2.656	2.601	2.654	3.025	2.415	2.961	2.563	2.58	2.584	1.851	3.481	2.69	2.552	2.752	2.39	2.285	2.664
HC (LO group)	1	63	12	subject109	2.125	3.161	2.186	1.704	2.963	2.301	2.286	2.637	1.813	2.163	2.305	1.733	2.026	2.589	1.933	2.21	2.143	2.638	2.236	1.435	1.91	2.439	2.258	2.137	2.415	2.072	2.276	2.06	2.39	2.148	2.377	3.383	1.951	2.517	2.541	2.345	2.154	1.814	3.219	2.494	2.262	2.787	1.896	2.099	2.493
HC (LO group)	1	71	9	subject110	2.438	2.82	2.479	1.63	3.465	2.733	2.347	2.722	2.243	2.209	2.673	1.819	2.478	2.751	3.04	2.456	2.284	2.596	2.372	1.49	2.132	2.384	2.633	2.258	2.98	2.318	2.747	2.164	2.726	2.477	2.891	3.464	2.241	2.79	2.268	2.635	2.523	1.833	3.633	2.711	2.429	2.678	2.4	2.185	2.605
HC (LO group)	2	60	12	subject111	2.611	3.13	2.727	1.941	3.405	2.759	2.39	2.835	2.59	2.251	2.655	2.034	2.5	2.957	2.73	2.446	2.525	2.585	2.44	1.597	2.087	2.802	2.652	2.418	2.787	2.519	2.768	2.152	2.66	2.606	2.655	3.026	2.413	2.963	2.566	2.583	2.581	1.853	3.487	2.687	2.554	2.749	2.388	2.27	2.663
HC (LO group)	1	62	18	subject112	2.648	2.962	2.518	1.731	3.483	2.726	2.439	2.913	2.482	2.242	2.59	2.016	2.584	3.018	2.939	2.535	2.601	2.784	2.722	1.488	2.119	2.392	2.614	2.317	2.826	2.472	2.938	2.175	2.726	2.42	2.999	3.485	2.3	2.802	2.614	2.919	2.601	1.757	3.558	2.744	2.521	2.697	2.648	2.416	2.592
HC (LO group)	1	68	15	subject113	2.729	3.164	2.58	1.901	2.893	2.96	2.448	3.063	2.653	2.526	2.546	2.102	2.249	2.972	2.122	2.522	2.414	2.514	2.388	1.569	2.031	2.733	2.532	2.507	2.842	2.369	2.893	2.237	2.744	2.605	2.707	3.511	2.144	2.575	2.633	2.537	2.619	1.899	3.555	2.596	2.607	2.897	2.149	2.321	2.671
HC (LO group)	1	66	16	subject114	2.267	2.681	2.485	1.753	3.197	2.683	2.475	2.891	2.148	2.281	2.505	1.982	2.351	2.815	2.492	2.357	2.514	2.249	2.442	1.609	1.993	2.318	2.499	2.295	2.732	2.392	2.614	2.163	2.595	2.465	2.773	3.308	2.037	2.792	2.584	2.319	2.469	1.816	3.164	2.54	2.304	2.626	2.175	2.316	2.533
HC (EO group)	2	59	16	subject115	2.433	2.674	2.54	1.872	3.633	2.697	2.347	2.854	2.306	2.15	2.698	1.998	2.474	2.745	3.206	2.418	2.578	2.651	2.449	1.64	2.131	2.376	2.579	2.247	2.922	2.476	2.72	2.146	2.767	2.655	2.651	3.615	2.438	2.929	2.634	2.537	2.544	1.864	3.612	2.837	2.522	2.891	2.387	2.247	2.826
HC (LO group)	2	64	9	subject116	2.416	2.629	2.654	1.908	3.143	2.596	2.407	2.697	2.326	2.132	2.485	2.025	2.331	2.853	2.869	2.393	2.435	2.839	2.494	1.641	2.134	2.559	2.433	2.418	2.551	2.468	2.789	2.158	2.852	2.624	2.867	4.013	2.256	2.748	2.422	2.617	2.479	1.791	3.153	2.62	2.619	2.693	2.416	2.232	2.453
HC (EO group)	1	59	22	subject117	2.509	2.806	2.53	1.901	3.168	2.6	2.386	2.711	2.377	2.283	2.583	2.015	2.546	2.866	2.595	2.374	2.49	2.711	2.425	1.652	2.104	2.432	2.538	2.302	2.482	2.427	2.772	2.188	2.858	2.535	2.686	3.197	2.227	3.056	2.55	2.597	2.405	1.964	3.005	2.536	2.442	2.672	2.43	2.316	2.563
HC (LO group)	1	71	13	subject118	2.396	2.427	2.344	1.905	3.453	2.778	2.419	2.894	2.374	2.399	2.619	1.992	2.535	2.849	2.296	2.397	2.483	2.483	2.333	1.718	2.165	2.3	2.524	2.331	2.754	2.356	2.653	2.072	2.627	2.377	2.845	3.404	1.964	3.034	2.585	2.357	2.428	1.884	3.385	2.666	2.43	2.968	2.245	2.251	2.591
HC (LO group)	1	61	16	subject119	2.497	2.749	2.592	1.858	3.195	2.602	2.322	2.702	2.553	2.311	2.519	2.012	2.314	2.802	2.347	2.443	2.379	2.518	2.13	1.504	2.098	2.571	2.527	2.319	2.727	2.322	2.603	2.157	2.738	2.349	2.588	3.621	2.376	2.751	2.378	2.364	2.414	1.767	3.533	2.621	2.402	2.616	2.367	2.272	2.483
HC (EO group)	2	52	9	subject120	2.385	2.619	2.324	1.798	2.595	2.624	2.453	2.598	2.499	2.075	2.536	1.953	2.325	2.587	2.529	2.503	2.441	2.329	2.38	1.524	2.073	2.432	2.525	2.387	2.631	2.344	2.625	2.15	2.502	2.343	2.695	2.682	2.298	2.631	2.509	2.493	2.556	1.931	2.959	2.588	2.467	2.62	2.338	2.247	2.447
HC (LO group)	2	62	12	subject121	2.44	2.57	2.356	1.99	3.374	2.535	2.332	2.673	2.19	2.226	2.495	1.994	2.354	2.724	2.659	2.428	2.497	2.305	2.414	1.695	2.192	2.423	2.515	2.21	2.582	2.29	2.488	2.194	2.635	2.467	2.679	3.531	2.601	2.846	2.418	2.158	2.364	1.943	3.573	2.474	2.433	2.765	2.203	2.26	2.536
HC (EO group)	1	59	14	subject122	2.613	2.555	2.665	1.746	3.611	2.609	2.321	2.896	2.463	2.206	2.6	1.95	2.461	2.811	2.305	2.564	2.688	2.638	2.41	1.527	2.233	2.622	2.66	2.533	2.49	2.418	2.798	2.211	2.748	2.493	2.913	3.877	2.218	2.876	2.539	2.621	2.58	1.888	3.35	2.744	2.467	2.681	2.274	2.331	2.734
HC (LO group)	1	62	5	subject123	2.765	2.539	2.465	1.717	3.242	2.459	2.38	2.725	1.985	2.15	2.617	1.781	2.521	2.869	2.284	2.085	2.421	2.659	2.433	1.465	2.083	2.321	2.46	2.167	2.713	2.279	2.619	2.02	2.677	2.524	2.86	3.373	1.929	2.955	2.542	2.999	2.41	1.79	3.509	2.304	2.322	2.536	2.023	2.14	2.466
HC (EO group)	1	55	12	subject124	2.329	2.448	2.347	1.643	3.082	2.514	2.363	2.525	2.175	2.035	2.544	1.904	2.311	2.675	2.596	2.38	2.591	2.443	2.306	1.417	1.976	2.04	2.5	2.28	2.429	2.235	2.598	2.091	2.563	2.353	2.711	3.368	2.126	2.588	2.366	2.637	2.537	1.674	3.575	2.538	2.409	2.58	2.047	2.12	2.529
HC (LO group)	1	61	5	subject125	2.272	2.538	2.385	1.889	3.298	2.61	2.383	2.646	2.509	2.164	2.507	1.987	2.431	2.713	2.541	2.119	2.542	2.428	2.349	1.555	2.147	2.539	1.905	2.293	2.549	2.283	2.444	2.105	2.536	2.406	2.425	3.483	2.198	2.706	2.421	2.275	2.314	1.999	3.391	2.611	2.362	2.672	2.378	2.176	2.39
HC (EO group)	1	59	12	subject126	2.185	2.86	2.526	1.74	3.433	2.531	2.503	2.779	2.572	2.168	2.665	1.855	2.544	2.801	2.359	2.323	2.333	2.577	2.132	1.449	1.891	2.491	2.506	2.344	2.741	2.357	2.738	2.195	2.514	2.438	2.846	3.281	2.03	2.84	2.316	2.692	2.474	1.835	3.21	2.514	2.37	2.557	2.33	2.155	2.65
HC (EO group)	1	57	9	subject127	2.529	2.393	2.468	1.815	3.732	2.549	2.339	2.634	2.423	2.119	2.499	2.022	2.528	2.709	2.311	2.396	2.508	2.42	2.335	1.782	1.957	2.317	2.543	2.361	2.685	2.32	2.551	2.169	2.62	2.487	2.601	3.468	2.338	2.642	2.461	2.441	2.378	1.832	3.458	2.582	2.42	2.57	2.267	2.206	2.63
HC (EO group)	1	57	12	subject128	2.377	2.514	2.425	1.779	3.196	2.496	2.245	2.601	2.047	2.03	2.478	1.961	2.354	2.605	2.652	2.251	2.341	2.548	2.294	1.671	2.035	2.489	2.512	2.162	2.539	2.241	2.513	2.105	2.545	2.413	2.394	2.954	2.223	2.803	2.569	2.388	2.224	1.833	3.356	2.503	2.401	2.716	2.104	2.23	2.541
HC (LO group)	1	60	12	subject129	2.541	2.225	2.707	1.84	3.628	2.708	2.533	2.837	2.187	2.42	2.654	1.983	2.646	2.934	2.848	2.373	2.463	2.517	2.273	1.585	2.161	2.416	2.594	2.517	2.707	2.333	2.636	2.331	2.66	2.556	2.902	3.51	2.243	2.789	2.582	2.962	2.488	1.873	3.461	2.619	2.606	2.816	2.474	2.448	2.597
HC (EO group)	1	54	12	subject130	2.483	2.618	2.469	1.842	2.666	2.615	2.286	2.648	2.009	2.189	2.517	2.045	2.353	2.799	2.075	2.282	2.387	2.711	2.328	1.532	2.008	2.71	2.556	2.207	2.778	2.41	2.672	2.13	2.561	2.328	2.687	3.356	2.218	2.807	2.574	2.603	2.345	1.925	2.916	2.671	2.413	2.608	2.05	2.28	2.603
HC (LO group)	1	66	6	subject131	2.437	2.128	2.418	1.773	2.662	2.636	2.266	2.887	2.21	2.09	2.492	1.927	2.456	2.59	1.687	2.407	2.42	2.498	2.256	1.5	2.164	2.152	2.562	2.233	2.597	2.29	2.566	2.058	2.552	2.36	2.324	3.46	2.323	3.009	2.542	2.087	2.413	1.759	2.801	2.552	2.29	2.885	2.216	2.053	2.367
HC (LO group)	1	60	16	subject132	2.863	2.677	2.628	1.748	3.646	2.559	2.544	3.035	2.597	2.253	2.793	1.885	2.588	2.92	2.294	2.439	2.673	2.799	2.467	1.411	2.174	2.579	2.756	2.433	3.018	2.455	2.832	2.106	2.872	2.684	2.771	3.698	2.083	2.918	2.712	2.751	2.553	1.909	3.613	2.545	2.442	2.775	2.679	2.144	2.507
HC (EO group)	1	57	9	subject133	2.636	2.724	2.368	1.867	3.18	2.637	2.466	2.871	2.239	2.213	2.609	1.912	2.495	2.93	2.497	2.307	2.619	2.757	2.364	1.375	2.065	2.547	2.527	2.487	2.741	2.306	2.661	2.225	2.791	2.53	2.585	3.354	2.074	2.904	2.436	2.766	2.26	1.914	3.19	2.763	2.488	2.833	2.222	2.38	2.592
HC (LO group)	1	64	6	subject134	2.387	3.013	2.331	1.865	2.952	2.409	2.42	2.408	2.359	2.171	2.378	2.185	2.561	2.797	2.07	2.003	2.463	2.328	2.268	1.848	2.049	2.275	2.134	2.126	2.612	2.368	2.638	2.32	2.37	2.443	2.876	2.987	1.906	2.821	2.405	2.631	2.193	1.904	3.435	2.496	2.427	2.491	2.53	2.176	2.403
HC (LO group)	2	65	9	subject135	1.806	2.285	2.385	1.805	2.873	2.442	2.294	2.531	2.235	2.021	2.364	1.829	2.229	2.272	2.686	2.34	2.23	2.502	2.292	1.388	2.054	2.316	2.335	2.29	2.396	2.23	2.546	2.2	2.181	2.29	2.594	3.138	1.776	2.611	2.219	2.466	2.32	1.822	2.465	2.371	2.347	2.622	2.241	2.163	2.522
HC (LO group)	1	65	12	subject136	2.324	2.618	2.542	1.983	3.361	2.6	2.319	2.785	2.311	2.324	2.67	2.043	2.456	2.794	2.325	2.567	2.469	2.33	2.451	1.498	2.157	2.333	2.723	2.264	2.514	2.301	2.824	2.217	2.538	2.398	2.837	3.327	2.319	2.927	2.407	2.449	2.434	2.135	3.751	2.722	2.369	2.896	2.066	2.382	2.662
HC (LO group)	2	65	6	subject137	2.475	2.446	2.544	1.977	3.413	2.706	2.347	2.621	2.105	2.199	2.435	2.033	2.435	2.76	2.798	2.489	2.381	2.212	2.215	1.706	2.061	2.281	2.63	2.321	2.884	2.362	2.757	2.182	2.592	2.406	3.07	3.464	2.133	2.656	2.342	2.884	2.412	1.889	3.21	2.727	2.346	2.868	2.344	2.262	2.577
HC (LO group)	1	65	12	subject138	2.692	2.925	2.616	1.952	3.379	2.544	2.499	2.921	2.864	2.186	2.482	2.064	2.658	2.834	2.107	2.623	2.582	2.677	2.623	1.66	2.18	2.701	2.754	2.51	2.623	2.526	2.774	2.18	2.662	2.583	3.064	3.392	2.396	3.026	2.818	2.724	2.655	2.036	3.167	2.798	2.567	2.982	2.645	2.396	2.886
HC (LO group)	1	72	9	subject139	2.44	2.432	2.302	1.869	3.687	2.632	2.227	2.793	2.303	2.241	2.564	1.884	2.328	2.762	2.421	2.465	2.38	2.538	2.231	1.528	1.99	2.429	2.408	2.194	2.425	2.205	2.603	2.089	2.585	2.391	2.544	3.782	2.088	2.581	2.52	2.337	2.299	1.877	3.346	2.498	2.379	2.59	2.404	2.116	2.528
HC (LO group)	1	59	12	subject140	2.3	2.668	2.547	1.819	3.416	2.685	2.335	2.651	2.395	2.133	2.605	2.034	2.278	2.613	2.084	2.132	2.396	2.634	2.319	1.632	2.148	2.346	1.892	2.387	2.93	2.438	2.571	2.113	2.528	2.444	2.502	3.333	2.058	2.48	2.442	2.78	2.433	1.929	3.502	2.656	2.364	2.693	2.563	2.212	2.584
HC (EO group)	2	58	12	subject141	2.018	2.899	1.948	1.757	3.327	2.514	2.154	2.512	2.074	2.089	2.504	1.956	2.209	2.348	2.648	2.191	2.26	2.156	1.996	1.491	1.807	2.473	2.226	2.047	2.569	2.07	2.441	1.94	2.439	2.055	2.792	3.4	1.95	2.953	2.418	2.487	2.224	1.718	3.442	2.442	2.15	2.528	1.918	2.113	2.416
HC (LO group)	2	69	16	subject142	2.899	3.012	2.664	1.911	3.016	2.895	2.568	2.962	2.497	2.125	2.798	2.162	2.344	2.945	2.287	2.599	2.608	2.636	2.689	1.597	2.155	2.548	2.753	2.629	2.752	2.667	2.945	2.387	2.859	2.709	3.075	2.627	2.451	3.151	2.529	2.506	2.714	1.952	3.248	2.819	2.655	2.83	2.462	2.325	2.609
HC (LO group)	2	72	12	subject143	2.549	2.724	2.452	1.97	3.092	2.684	2.461	2.814	2.744	2.269	2.53	2.2	2.55	2.745	2.245	2.544	2.488	2.593	2.312	1.621	2.105	3.011	2.538	2.45	2.857	2.357	2.793	2.261	2.818	2.587	2.934	2.978	2.748	2.986	2.715	2.783	2.459	1.931	2.598	2.577	2.454	2.61	2.374	2.415	2.919
HC (LO group)	1	66	7	subject144	2.441	2.588	2.535	1.768	3.3	2.791	2.382	2.855	2.27	2.151	2.52	1.867	2.301	2.863	2.652	2.409	2.558	2.65	2.427	1.504	2.081	2.485	2.684	2.276	2.502	2.461	2.639	2.156	2.821	2.458	2.691	3.341	2.189	2.847	2.664	2.339	2.482	1.778	3.43	2.652	2.473	2.735	2.292	2.2	2.506
HC (LO group)	1	66	13	subject145	2.566	2.304	2.49	1.712	3.705	2.76	2.373	2.876	2.29	2.132	2.616	1.944	2.499	2.735	2.182	2.427	2.535	2.754	2.359	1.518	2.193	2.507	2.568	2.374	2.521	2.321	2.621	2.119	2.711	2.566	2.714	3.529	2.149	2.806	2.437	2.477	2.537	1.779	3.588	2.677	2.361	2.631	2.283	2.126	2.586
HC (LO group)	1	67	13	subject146	2.254	3.032	2.7	1.911	3.006	2.61	2.226	2.916	2.274	2.21	2.746	1.987	2.457	2.647	2.433	2.542	2.448	2.455	2.218	1.72	2.171	2.566	2.645	2.276	3.109	2.425	2.861	2.181	2.82	2.479	2.797	3.763	2.356	2.976	2.725	2.628	2.613	1.964	3.327	2.656	2.302	2.903	2.454	2.297	2.724
HC (LO group)	1	65	12	subject147	2.528	2.215	2.553	1.822	3.382	2.695	2.447	2.906	2.459	2.234	2.535	1.912	2.351	2.97	2.474	2.413	2.411	2.331	2.435	1.458	2.144	2.66	2.692	2.332	2.666	2.373	2.613	2.231	2.662	2.462	2.681	3.648	2.262	3.116	2.528	2.387	2.443	1.879	3.288	2.722	2.43	2.584	2.32	2.383	2.695
HC (LO group)	2	70	12	subject148	2.499	2.639	2.509	1.908	3.181	2.765	2.612	2.773	2.411	2.372	2.664	2.075	2.514	2.928	2.635	2.526	2.508	2.521	2.347	1.623	2.08	2.75	2.764	2.512	2.854	2.383	2.756	2.309	2.767	2.678	2.818	3.474	2.376	2.742	2.394	2.442	2.676	2.089	3.196	2.731	2.613	2.891	2.452	2.417	2.499
HC (LO group)	2	68	12	subject149	2.342	2.491	2.497	1.85	2.87	2.433	2.203	2.46	2.204	1.96	2.537	1.857	2.319	2.669	2.106	2.443	2.472	2.83	2.447	1.547	2.023	2.456	2.594	2.229	2.694	2.528	2.756	2.076	2.664	2.406	2.812	3.424	2.051	2.784	2.434	2.497	2.477	1.736	2.944	2.476	2.342	2.644	2.137	2.132	2.296
HC (LO group)	2	67	12	subject150	2.356	2.649	2.359	1.717	3.131	2.476	2.22	2.598	2.55	2.109	2.577	2.017	2.448	2.499	2.676	2.618	2.363	2.448	2.167	1.432	2.094	2.517	2.549	2.293	2.565	2.334	2.567	2.089	2.592	2.468	2.859	3.094	2.152	2.83	2.5	2.505	2.414	1.793	2.966	2.618	2.305	2.604	2.738	2.185	2.541
HC (LO group)	2	64	12	subject151	2.313	2.695	2.467	1.78	3.118	2.718	2.296	2.827	2.338	2.237	2.571	2.05	2.635	2.647	2.287	2.277	2.424	3.212	2.448	1.57	1.997	2.444	2.388	2.364	2.572	2.405	2.744	2.049	2.587	2.518	2.777	3.991	2.239	3.108	2.344	2.551	2.633	1.917	2.997	2.56	2.35	2.7	2.398	2.257	2.692
HC (LO group)	2	67	10	subject152	2.514	2.625	2.417	1.881	3.028	2.667	2.489	2.845	2.655	2.368	2.617	2.04	2.471	2.76	2.575	2.306	2.57	2.584	2.462	1.576	2.064	2.555	2.451	2.434	2.612	2.363	2.642	2.248	2.594	2.438	2.654	3.106	2.339	2.749	2.439	2.671	2.525	1.977	3.647	2.679	2.486	2.792	2.697	2.369	2.451
HC (LO group)	2	66	9	subject153	2.332	2.691	2.627	1.755	3.068	2.573	2.338	2.685	2.514	2.293	2.729	1.803	2.67	2.783	2.496	2.499	2.487	2.889	2.435	1.621	2.231	2.467	2.537	2.396	2.972	2.528	2.86	2.266	2.657	2.582	3.089	2.947	2.281	2.738	2.538	2.708	2.573	1.81	2.992	2.673	2.5	2.826	2.492	2.343	2.858
HC (EO group)	1	55	12	subject154	2.64	2.98	2.458	1.85	3.536	2.753	2.448	2.735	2.338	2.262	2.754	1.987	2.714	2.967	2.846	2.637	2.643	2.469	2.185	1.36	2.023	2.475	2.444	2.511	3.152	2.305	2.786	2.213	2.788	2.48	2.623	3.756	2.215	2.935	2.559	2.668	2.449	1.864	4.031	2.689	2.484	2.928	2.35	2.239	2.81
HC (LO group)	1	69	12	subject155	2.152	2.633	2.404	1.864	2.989	2.496	2.231	2.546	2.151	2.141	2.415	1.756	2.258	2.467	2.076	2.43	2.366	2.435	2.285	1.624	2.029	2.462	2.503	2.272	2.692	2.251	2.552	2.141	2.494	2.214	2.527	3.386	2.234	2.653	2.335	2.733	2.454	1.814	3.604	2.459	2.282	2.517	2.231	2.097	2.54
HC (LO group)	1	74	9	subject156	2.277	2.676	2.381	1.679	3.099	2.556	2.299	2.562	2.277	2.046	2.274	1.855	2.132	2.537	2.059	2.542	2.386	2.324	2.175	1.447	2.323	2.355	2	1.906	2.635	2.235	2.724	2.113	2.372	2.3	2.279	3.168	1.905	2.508	2.136	2.234	2.48	1.661	3.558	2.473	2.281	2.573	2.323	2.103	2.372
[truncated: 23 more columns]
